# Supplementary material for: Modulation of Visual Responses and Ocular Dominance by Contralateral Inhibitory Activation in the Mouse Visual Cortex
Source: MDPI journal article supplement (doi:10.3390/ijms24065750), 2023-03-17
Supplement: s1 [file s1]

| Figure  | Sample size (n)                        | Statistical test | P value                                                                                                                                                                                                                                                                                                                                                                                                                                  |
|---------|----------------------------------------|------------------|------------------------------------------------------------------------------------------------------------------------------------------------------------------------------------------------------------------------------------------------------------------------------------------------------------------------------------------------------------------------------------------------------------------------------------------|
| Fig. 1i | VGAT, n = 5<br>PV, n = 5<br>SST, n = 4 | one-way ANOVA    | Near,<br>F(2,11) = 7.231, p= 0.0099<br>Turkey's multiple comparisons test:<br>VGAT vs. PV, p = 0.0136<br>VGAT vs. SST, p = 0.9688<br>PV vs. SST, p = 0.0288<br>Far,<br>F(2,11) = 0.7875, p= 0.4790<br>Turkey's multiple comparisons test:<br>VGAT vs. PV, p = 0.4478<br>VGAT vs. SST, p = 0.8406<br>PV vs. SST, p = 0.8140                                                                                                               |
| Fig. 1j | VGAT, n = 5<br>PV, n = 5<br>SST, n = 4 | one-way ANOVA    | Near,<br>F(2,11) = 8.127, p= 0.0068<br>Turkey's multiple comparisons test:<br>VGAT vs. PV, p = 0.0064<br>VGAT vs. SST, p = 0.6341<br>PV vs. SST, p = 0.0463<br>Far,<br>F(2,11) = 9.238, p= 0.0044<br>Turkey's multiple comparisons test:<br>VGAT vs. PV, p = 0.0055<br>VGAT vs. SST, p = 0.0184<br>PV vs. SST, p = 0.8800                                                                                                                |
| Fig. 3c | n = 5                                  | two-way RM ANOVA | Ipsi:<br>Intensity, F(5,20) = 1.935, p = 0.1332<br>Laser, F(1,4) = 3.750, p = 0.1249<br>Intensity x laser,<br>F(5,20) = 0.6586, p = 0.6588<br>Cont:<br>Intensity, F(5,20) = 3.005, p = 0.0350<br>Laser, F(1,4) = 0.0271, p = 0.8773<br>Intensity x laser,<br>F(5,20) = 1.002, p = 0.4420<br>Mono:<br>Intensity, F(5,20) = 0.7633, p = 0.5869<br>Laser, F(1,4) = 0.1817, p = 0.6918<br>Intensity x laser,<br>F(5,20) = 0.5713, p = 0.7211 |
| Fig. 3d | n = 8                                  | two-way RM ANOVA | Ipsi:<br>Intensity, F(5,35) = 17.53, p < 0.0001<br>Laser, F(1,7) = 71.03, p < 0.0001<br>Intensity x laser,<br>F(5,35) = 18.09, p < 0.0001<br>Cont:<br>Intensity, F(5,35) = 5.198, p = 0.0011<br>Laser, F(1,7) = 41.89, p = 0.0003<br>Intensity x laser,<br>F(5,35) = 6.722, p = 0.0002                                                                                                                                                   |

|         |       |                  |                                                                                                                                                                                                                                                                                                                                                                                                                                                                                                                                                                                                                                                                                                                                                     |
|---------|-------|------------------|-----------------------------------------------------------------------------------------------------------------------------------------------------------------------------------------------------------------------------------------------------------------------------------------------------------------------------------------------------------------------------------------------------------------------------------------------------------------------------------------------------------------------------------------------------------------------------------------------------------------------------------------------------------------------------------------------------------------------------------------------------|
|         |       |                  | <p>Mono:</p> <p>Intensity, <math>F(5,35) = 3.351</math>, <math>p = 0.0141</math></p> <p>Laser, <math>F(1,7) = 109.8</math>, <math>p &lt; 0.0001</math></p> <p>Intensity x laser,</p> <p><math>F(5,35) = 5.932</math>, <math>p = 0.0005</math></p>                                                                                                                                                                                                                                                                                                                                                                                                                                                                                                   |
| Fig. 3e | n = 9 | two-way RM ANOVA | <p>Ipsi:</p> <p>Intensity, <math>F(5,40) = 2.910</math>, <math>p = 0.0248</math></p> <p>Laser, <math>F(1,8) = 29.31</math>, <math>p = 0.0006</math></p> <p>Intensity x laser,</p> <p><math>F(5,40) = 15.29</math>, <math>p &lt; 0.0001</math></p> <p>Cont:</p> <p>Intensity, <math>F(5,40) = 1.101</math>, <math>p = 0.3751</math></p> <p>Laser, <math>F(1,8) = 64.49</math>, <math>p &lt; 0.0001</math></p> <p>Intensity x laser,</p> <p><math>F(5,40) = 6.553</math>, <math>p = 0.0002</math></p> <p>Mono:</p> <p>Intensity, <math>F(5,40) = 0.3742</math>, <math>p = 0.8622</math></p> <p>Laser, <math>F(1,8) = 19.47</math>, <math>p = 0.0022</math></p> <p>Intensity x laser,</p> <p><math>F(5,40) = 1.536</math>, <math>p = 0.2005</math></p> |
| Fig. 3f | n = 4 | two-way RM ANOVA | <p>Ipsi:</p> <p>Intensity, <math>F(5,15) = 3.855</math>, <math>p = 0.0191</math></p> <p>Laser, <math>F(1,3) = 451.0</math>, <math>p = 0.0002</math></p> <p>Intensity x laser,</p> <p><math>F(5,15) = 6.415</math>, <math>p = 0.0022</math></p> <p>Cont:</p> <p>Intensity, <math>F(5,15) = 3.156</math>, <math>p = 0.0383</math></p> <p>Laser, <math>F(1,3) = 95.32</math>, <math>p = 0.0023</math></p> <p>Intensity x laser,</p> <p><math>F(5,15) = 6.670</math>, <math>p = 0.0019</math></p> <p>Mono:</p> <p>Intensity, <math>F(5,15) = 3.002</math>, <math>p = 0.0450</math></p> <p>Laser, <math>F(1,3) = 42.01</math>, <math>p = 0.0075</math></p> <p>Intensity x laser,</p> <p><math>F(5,15) = 6.357</math>, <math>p = 0.0023</math></p>        |
| Fig. 4c | n = 4 | two-way RM ANOVA | <p>Ipsi:</p> <p>Intensity, <math>F(5,15) = 0.6802</math>, <math>p = 0.6453</math></p> <p>Laser, <math>F(1,3) = 0.4660</math>, <math>p = 0.5438</math></p> <p>Intensity x laser,</p> <p><math>F(5,15) = 1.831</math>, <math>p = 0.1671</math></p> <p>Cont:</p> <p>Intensity, <math>F(5,15) = 1.623</math>, <math>p = 0.2142</math></p> <p>Laser, <math>F(1,3) = 0.7631</math>, <math>p = 0.4467</math></p> <p>Intensity x laser,</p> <p><math>F(5,15) = 0.8962</math>, <math>p = 0.5105</math></p> <p>Mono:</p> <p>Intensity, <math>F(5,15) = 0.4859</math>, <math>p = 0.8006</math></p> <p>Laser, <math>F(1,3) = 0.2675</math>, <math>p = 0.6407</math></p>                                                                                         |

|         |                            |                     |                                                                                                                                                                                                                                                                                                                                                                                                                                                                                                                                                                                                       |
|---------|----------------------------|---------------------|-------------------------------------------------------------------------------------------------------------------------------------------------------------------------------------------------------------------------------------------------------------------------------------------------------------------------------------------------------------------------------------------------------------------------------------------------------------------------------------------------------------------------------------------------------------------------------------------------------|
|         |                            |                     | Intensity x laser,<br>$F(5,15) = 0.4055, p = 0.8375$                                                                                                                                                                                                                                                                                                                                                                                                                                                                                                                                                  |
| Fig. 4d | n = 9                      | two-way RM<br>ANOVA | Ipsi:<br>Intensity, $F(5,40) = 1.155, p = 0.3479$<br>Laser, $F(1,8) = 33.18, p = 0.0004$<br>Intensity x laser,<br>$F(5,40) = 2.636, p = 0.0376$<br>Cont:<br>Intensity, $F(5,40) = 0.5663, p = 0.7252$<br>Laser, $F(1,8) = 18.13, p = 0.0028$<br>Intensity x laser,<br>$F(5,40) = 1.171, p = 0.3405$<br>Mono:<br>Intensity, $F(5,40) = 0.9449, p = 0.4628$<br>Laser, $F(1,8) = 3.528, p = 0.0972$<br>Intensity x laser,<br>$F(5,40) = 0.7674, p = 0.5788$                                                                                                                                              |
|         |                            |                     | WT:<br>Intensity, $F(5,20) = 0.8214, p = 0.5489$<br>Laser, $F(1,4) = 2.154, p = 0.2161$<br>Intensity x laser,<br>$F(5,20) = 0.4149, p = 0.8328$<br>VGAT:<br>Intensity, $F(5,35) = 8.678, p < 0.0001$<br>Laser, $F(1,7) = 36.63, p = 0.0004$<br>Intensity x laser,<br>$F(5,35) = 9.294, p < 0.0001$<br>PV:<br>Intensity, $F(5,40) = 2.770, p = 0.0306$<br>Laser, $F(1,8) = 18.06, p = 0.0028$<br>Intensity x laser,<br>$F(5,40) = 5.765, p = 0.0004$<br>SST:<br>Intensity, $F(5,15) = 3.404, p = 0.0297$<br>Laser, $F(1,3) = 20.02, p = 0.0208$<br>Intensity x laser,<br>$F(5,15) = 1.919, p = 0.1507$ |
| Fig. 5b | EYFP, n = 4<br>ChR2, n = 9 | two-way RM<br>ANOVA | EYFP:<br>Intensity, $F(5,15) = 0.8877, p = 0.5134$<br>Laser, $F(1,3) = 0.4197, p = 0.5633$<br>Intensity x laser,<br>$F(5,15) = 1.741, p = 0.1860$<br>ChR2:<br>Intensity, $F(5,40) = 0.8546, p = 0.5198$<br>Laser, $F(1,8) = 14.49, p = 0.0052$<br>Intensity x laser,<br>$F(5,40) = 1.116, p = 0.3693$                                                                                                                                                                                                                                                                                                 |

|         |       |               |                                                           |
|---------|-------|---------------|-----------------------------------------------------------|
| Fig. 6c | n = 4 | Paired t-test | ipsi, p = 0.5773,<br>cont, p = 0.2240,<br>ODI, p = 0.4934 |
| Fig. 6d | n = 5 | Paired t-test | ipsi, p = 0.0131,<br>cont, p = 0.6121,<br>ODI, p = 0.0398 |

**Table S1.** Summary of statistical analysis.
